# Supplementary material for: Construction of a terbium-based metal–organic framework for specific detection of MnO4− in aqueous media
Source: Royal Society of Chemistry journal article supplement (doi:10.1039/d3nj05649j), 2024-01-01
Supplement: d3nj05649j1.pdf [file d3nj05649j1.pdf]

## **Construction of a terbium-based metal-organic framework for specific detection of $\text{MnO}_4^-$ in aqueous media**

Guang-Ju Weng,<sup>[a]</sup> Kang-Min Cheng,<sup>[a]</sup> Jia-Qi Wu,<sup>[a]</sup> Wei Li,<sup>\*[b]</sup> Jian-Mei Lu<sup>\*[a]</sup> and Li-Xiong Shao<sup>\*[a]</sup>

[a] College of Chemistry and Materials Engineering, Wenzhou University, Chashan University Town, Wenzhou, Zhejiang Province 325035, People's Republic of China

E-mail: [ljm@wzu.edu.cn](mailto:ljm@wzu.edu.cn) [Shaolix@wzu.edu.cn](mailto:Shaolix@wzu.edu.cn)

[b] School of Biology and Chemistry, Key Laboratory of Chemical Synthesis and Environmental Pollution Control-Remediation Technology of Guizhou Province, Minzu Normal University of Xingyi, Xingyi 562400, Guizhou Province 562400, People's Republic of China

E-mail: [liweiwuxi@126.com](mailto:liweiwuxi@126.com)

**Table S1.** Crystal data and structure refinement for SLX-3.

|                                   |                                                                                                                    |
|-----------------------------------|--------------------------------------------------------------------------------------------------------------------|
| Identification code               | SLX-3                                                                                                              |
| Empirical formula                 | C <sub>34</sub> H <sub>23</sub> O <sub>10</sub> Tb                                                                 |
| Formula weight                    | 750.44                                                                                                             |
| Temperature                       | 296(2) K                                                                                                           |
| Wavelength                        | 0.71073 Å                                                                                                          |
| Crystal system                    | Triclinic                                                                                                          |
| Space group                       | <i>P</i> -1                                                                                                        |
| Unit cell dimensions              | a = 10.629(4) Å      α = 95.870(6)°<br>b = 10.842(4) Å      β = 102.724(6)°<br>c = 17.852(6) Å      γ = 97.703(6)° |
| Volume                            | 1970.2(11) Å <sup>3</sup>                                                                                          |
| Z                                 | 2                                                                                                                  |
| Density (calculated)              | 1.265 Mg/m <sup>3</sup>                                                                                            |
| Absorption coefficient            | 1.840 mm <sup>-1</sup>                                                                                             |
| F(000)                            | 744                                                                                                                |
| Crystal size                      | 0.290 x 0.220 x 0.180 mm <sup>3</sup>                                                                              |
| Theta range for data collection   | 1.990 to 26.000°                                                                                                   |
| Index ranges                      | -13 ≤ h ≤ 13, -13 ≤ k ≤ 13, -21 ≤ l ≤ 22                                                                           |
| Reflections collected             | 18891                                                                                                              |
| Independent reflections           | 7620 [R(int) = 0.0364]                                                                                             |
| Completeness to theta = 25.242°   | 98.3%                                                                                                              |
| Absorption correction             | Semi-empirical from equivalents                                                                                    |
| Max. and min. transmission        | 0.719 and 0.623                                                                                                    |
| Refinement method                 | Full-matrix least-squares on F <sup>2</sup>                                                                        |
| Data/restraints/parameters        | 7620/38/407                                                                                                        |
| Goodness-of-fit on F <sup>2</sup> | 1.075                                                                                                              |
| Final R indices [I > 2σ(I)]       | R1 = 0.0418, wR2 = 0.1180                                                                                          |
| R indices (all data)              | R1 = 0.0467, wR2 = 0.1205                                                                                          |
| Extinction coefficient            | n/a                                                                                                                |
| Largest diff. peak and hole       | 2.058 and -1.149 e.Å <sup>-3</sup>                                                                                 |

**Table S2.** Bond lengths [Å] and angles [°] for SLX-3.

---

|               |           |
|---------------|-----------|
| Tb(1)-O(1)    | 2.285(4)  |
| Tb(1)-O(5)    | 2.322(3)  |
| Tb(1)-O(6)#1  | 2.335(3)  |
| Tb(1)-O(2)#1  | 2.336(4)  |
| Tb(1)-O(9)    | 2.361(5)  |
| Tb(1)-O(3)#2  | 2.425(4)  |
| Tb(1)-O(10)   | 2.459(4)  |
| Tb(1)-O(4)#2  | 2.507(4)  |
| Tb(1)-C(17)#2 | 2.807(5)  |
| O(1)-C(1)     | 1.239(7)  |
| O(2)-C(1)     | 1.244(7)  |
| O(3)-C(17)    | 1.270(6)  |
| O(4)-C(17)    | 1.231(6)  |
| O(5)-C(18)    | 1.237(6)  |
| O(6)-C(18)    | 1.258(6)  |
| O(7)-C(34)    | 1.295(16) |
| O(7)-H(7)     | 0.9039    |
| O(8)-C(34)    | 1.202(14) |
| O(9)-H(9A)    | 0.8500    |
| O(9)-H(9C)    | 0.8500    |
| O(10)-H(10A)  | 0.8500    |
| O(10)-H(10C)  | 0.8500    |
| C(1)-C(2)     | 1.490(8)  |
| C(2)-C(3)     | 1.382(8)  |
| C(2)-C(7)     | 1.403(8)  |
| C(3)-C(4)     | 1.391(11) |
| C(3)-H(3)     | 0.9300    |
| C(4)-C(5)     | 1.399(12) |
| C(4)-H(4)     | 0.9300    |
| C(5)-C(6)     | 1.366(10) |
| C(5)-H(5)     | 0.9300    |
| C(6)-C(7)     | 1.390(8)  |
| C(6)-H(6)     | 0.9300    |
| C(7)-C(8)     | 1.491(7)  |

|               |           |
|---------------|-----------|
| C(8)-C(13)    | 1.365(8)  |
| C(8)-C(9)     | 1.392(7)  |
| C(9)-C(10)    | 1.362(7)  |
| C(9)-H(9)     | 0.9300    |
| C(10)-C(11)   | 1.390(7)  |
| C(10)-H(10)   | 0.9300    |
| C(11)-C(12)   | 1.388(7)  |
| C(11)-C(14)   | 1.486(7)  |
| C(12)-C(13)   | 1.400(7)  |
| C(12)-H(12)   | 0.9300    |
| C(13)-H(13)   | 0.9300    |
| C(14)-C(15)   | 1.394(7)  |
| C(14)-C(16)#3 | 1.399(6)  |
| C(15)-C(16)   | 1.383(7)  |
| C(15)-C(17)   | 1.515(6)  |
| C(16)-H(16)   | 0.9300    |
| C(18)-C(19)   | 1.510(6)  |
| C(19)-C(20)   | 1.385(7)  |
| C(19)-C(21)#4 | 1.408(6)  |
| C(20)-C(21)   | 1.382(6)  |
| C(20)-H(20)   | 0.9300    |
| C(21)-C(22)   | 1.485(7)  |
| C(22)-C(27)   | 1.375(8)  |
| C(22)-C(23)   | 1.382(8)  |
| C(23)-C(24)   | 1.381(9)  |
| C(23)-H(23)   | 0.9300    |
| C(24)-C(25)   | 1.332(11) |
| C(24)-H(24)   | 0.9300    |
| C(25)-C(26)   | 1.403(11) |
| C(25)-C(28)   | 1.498(10) |
| C(26)-C(27)   | 1.379(9)  |
| C(26)-H(26)   | 0.9300    |
| C(27)-H(27)   | 0.9300    |
| C(28)-C(29)   | 1.344(13) |
| C(28)-C(33)   | 1.432(13) |
| C(29)-C(30)   | 1.393(15) |

|                     |            |
|---------------------|------------|
| C(29)-H(29)         | 0.9300     |
| C(33)-C(32)         | 1.386(14)  |
| C(33)-C(34)         | 1.506(16)  |
| C(31)-C(30)         | 1.341(18)  |
| C(31)-C(32)         | 1.411(17)  |
| C(31)-H(31)         | 0.9300     |
| C(32)-H(32)         | 0.9300     |
| C(30)-H(30)         | 0.9300     |
| O(1)-Tb(1)-O(5)     | 79.69(14)  |
| O(1)-Tb(1)-O(6)#1   | 76.49(16)  |
| O(5)-Tb(1)-O(6)#1   | 125.35(13) |
| O(1)-Tb(1)-O(2)#1   | 123.70(16) |
| O(5)-Tb(1)-O(2)#1   | 79.50(14)  |
| O(6)#1-Tb(1)-O(2)#1 | 74.45(14)  |
| O(1)-Tb(1)-O(9)     | 80.6(2)    |
| O(5)-Tb(1)-O(9)     | 83.69(16)  |
| O(6)#1-Tb(1)-O(9)   | 137.83(18) |
| O(2)#1-Tb(1)-O(9)   | 146.64(19) |
| O(1)-Tb(1)-O(3)#2   | 137.47(14) |
| O(5)-Tb(1)-O(3)#2   | 142.30(13) |
| O(6)#1-Tb(1)-O(3)#2 | 79.38(15)  |
| O(2)#1-Tb(1)-O(3)#2 | 81.53(15)  |
| O(9)-Tb(1)-O(3)#2   | 95.02(19)  |
| O(1)-Tb(1)-O(10)    | 142.89(18) |
| O(5)-Tb(1)-O(10)    | 71.40(15)  |
| O(6)#1-Tb(1)-O(10)  | 139.72(18) |
| O(2)#1-Tb(1)-O(10)  | 73.71(17)  |
| O(9)-Tb(1)-O(10)    | 73.7(2)    |
| O(3)#2-Tb(1)-O(10)  | 72.12(15)  |
| O(1)-Tb(1)-O(4)#2   | 86.20(14)  |
| O(5)-Tb(1)-O(4)#2   | 154.80(14) |
| O(6)#1-Tb(1)-O(4)#2 | 70.20(13)  |
| O(2)#1-Tb(1)-O(4)#2 | 125.61(13) |
| O(9)-Tb(1)-O(4)#2   | 73.41(16)  |
| O(3)#2-Tb(1)-O(4)#2 | 52.60(13)  |
| O(10)-Tb(1)-O(4)#2  | 110.77(14) |

|                      |            |
|----------------------|------------|
| O(1)-Tb(1)-C(17)#2   | 110.96(15) |
| O(5)-Tb(1)-C(17)#2   | 163.70(13) |
| O(6)#1-Tb(1)-C(17)#2 | 70.31(14)  |
| O(2)#1-Tb(1)-C(17)#2 | 102.96(14) |
| O(9)-Tb(1)-C(17)#2   | 85.93(16)  |
| O(3)#2-Tb(1)-C(17)#2 | 26.85(14)  |
| O(10)-Tb(1)-C(17)#2  | 93.63(15)  |
| O(4)#2-Tb(1)-C(17)#2 | 26.01(14)  |
| C(1)-O(1)-Tb(1)      | 165.3(4)   |
| C(1)-O(2)-Tb(1)#1    | 126.6(4)   |
| C(17)-O(3)-Tb(1)#5   | 93.6(3)    |
| C(17)-O(4)-Tb(1)#5   | 90.7(3)    |
| C(18)-O(5)-Tb(1)     | 139.7(3)   |
| C(18)-O(6)-Tb(1)#1   | 140.3(3)   |
| C(34)-O(7)-H(7)      | 119.5      |
| Tb(1)-O(9)-H(9A)     | 109.2      |
| Tb(1)-O(9)-H(9C)     | 109.4      |
| H(9A)-O(9)-H(9C)     | 109.5      |
| Tb(1)-O(10)-H(10A)   | 109.2      |
| Tb(1)-O(10)-H(10C)   | 109.3      |
| H(10A)-O(10)-H(10C)  | 109.5      |
| O(1)-C(1)-O(2)       | 122.8(5)   |
| O(1)-C(1)-C(2)       | 119.4(5)   |
| O(2)-C(1)-C(2)       | 117.7(5)   |
| C(3)-C(2)-C(7)       | 119.8(6)   |
| C(3)-C(2)-C(1)       | 117.4(5)   |
| C(7)-C(2)-C(1)       | 122.8(5)   |
| C(2)-C(3)-C(4)       | 121.1(7)   |
| C(2)-C(3)-H(3)       | 119.4      |
| C(4)-C(3)-H(3)       | 119.4      |
| C(3)-C(4)-C(5)       | 118.3(6)   |
| C(3)-C(4)-H(4)       | 120.8      |
| C(5)-C(4)-H(4)       | 120.8      |
| C(6)-C(5)-C(4)       | 120.9(7)   |
| C(6)-C(5)-H(5)       | 119.5      |
| C(4)-C(5)-H(5)       | 119.6      |

|                     |          |
|---------------------|----------|
| C(5)-C(6)-C(7)      | 120.9(7) |
| C(5)-C(6)-H(6)      | 119.5    |
| C(7)-C(6)-H(6)      | 119.5    |
| C(6)-C(7)-C(2)      | 118.9(5) |
| C(6)-C(7)-C(8)      | 119.4(5) |
| C(2)-C(7)-C(8)      | 121.6(5) |
| C(13)-C(8)-C(9)     | 118.7(5) |
| C(13)-C(8)-C(7)     | 122.2(5) |
| C(9)-C(8)-C(7)      | 119.1(5) |
| C(10)-C(9)-C(8)     | 120.5(5) |
| C(10)-C(9)-H(9)     | 119.8    |
| C(8)-C(9)-H(9)      | 119.8    |
| C(9)-C(10)-C(11)    | 121.7(5) |
| C(9)-C(10)-H(10)    | 119.1    |
| C(11)-C(10)-H(10)   | 119.1    |
| C(12)-C(11)-C(10)   | 117.9(5) |
| C(12)-C(11)-C(14)   | 123.5(4) |
| C(10)-C(11)-C(14)   | 118.5(4) |
| C(11)-C(12)-C(13)   | 120.0(5) |
| C(11)-C(12)-H(12)   | 120.0    |
| C(13)-C(12)-H(12)   | 120.0    |
| C(8)-C(13)-C(12)    | 121.1(5) |
| C(8)-C(13)-H(13)    | 119.5    |
| C(12)-C(13)-H(13)   | 119.5    |
| C(15)-C(14)-C(16)#3 | 116.8(4) |
| C(15)-C(14)-C(11)   | 124.0(4) |
| C(16)#3-C(14)-C(11) | 118.9(4) |
| C(16)-C(15)-C(14)   | 121.1(4) |
| C(16)-C(15)-C(17)   | 115.3(4) |
| C(14)-C(15)-C(17)   | 123.6(4) |
| C(15)-C(16)-C(14)#3 | 122.2(5) |
| C(15)-C(16)-H(16)   | 118.9    |
| C(14)#3-C(16)-H(16) | 118.9    |
| O(4)-C(17)-O(3)     | 121.9(4) |
| O(4)-C(17)-C(15)    | 120.2(4) |
| O(3)-C(17)-C(15)    | 117.8(4) |

|                     |          |
|---------------------|----------|
| O(4)-C(17)-Tb(1)#5  | 63.3(2)  |
| O(3)-C(17)-Tb(1)#5  | 59.6(2)  |
| C(15)-C(17)-Tb(1)#5 | 166.1(3) |
| O(5)-C(18)-O(6)     | 125.3(4) |
| O(5)-C(18)-C(19)    | 117.8(4) |
| O(6)-C(18)-C(19)    | 116.8(4) |
| C(20)-C(19)-C(21)#4 | 119.2(4) |
| C(20)-C(19)-C(18)   | 117.2(4) |
| C(21)#4-C(19)-C(18) | 123.2(4) |
| C(21)-C(20)-C(19)   | 123.3(4) |
| C(21)-C(20)-H(20)   | 118.4    |
| C(19)-C(20)-H(20)   | 118.4    |
| C(20)-C(21)-C(19)#4 | 117.5(4) |
| C(20)-C(21)-C(22)   | 119.4(4) |
| C(19)#4-C(21)-C(22) | 123.1(4) |
| C(27)-C(22)-C(23)   | 117.6(5) |
| C(27)-C(22)-C(21)   | 123.5(5) |
| C(23)-C(22)-C(21)   | 118.9(5) |
| C(24)-C(23)-C(22)   | 120.8(6) |
| C(24)-C(23)-H(23)   | 119.6    |
| C(22)-C(23)-H(23)   | 119.6    |
| C(25)-C(24)-C(23)   | 122.3(7) |
| C(25)-C(24)-H(24)   | 118.9    |
| C(23)-C(24)-H(24)   | 118.8    |
| C(24)-C(25)-C(26)   | 117.5(6) |
| C(24)-C(25)-C(28)   | 121.4(7) |
| C(26)-C(25)-C(28)   | 121.1(7) |
| C(27)-C(26)-C(25)   | 120.8(7) |
| C(27)-C(26)-H(26)   | 119.6    |
| C(25)-C(26)-H(26)   | 119.7    |
| C(22)-C(27)-C(26)   | 120.8(6) |
| C(22)-C(27)-H(27)   | 119.6    |
| C(26)-C(27)-H(27)   | 119.6    |
| C(29)-C(28)-C(33)   | 119.2(8) |
| C(29)-C(28)-C(25)   | 121.4(9) |
| C(33)-C(28)-C(25)   | 119.2(8) |



|                   |           |
|-------------------|-----------|
| C(28)-C(29)-C(30) | 121.2(11) |
| C(28)-C(29)-H(29) | 119.4     |
| C(30)-C(29)-H(29) | 119.3     |
| C(32)-C(33)-C(28) | 119.2(10) |
| C(32)-C(33)-C(34) | 117.7(10) |
| C(28)-C(33)-C(34) | 122.0(9)  |
| O(8)-C(34)-O(7)   | 115.7(13) |
| O(8)-C(34)-C(33)  | 129.8(13) |
| O(7)-C(34)-C(33)  | 114.5(12) |
| C(30)-C(31)-C(32) | 120.8(15) |
| C(30)-C(31)-H(31) | 119.6     |
| C(32)-C(31)-H(31) | 119.6     |
| C(33)-C(32)-C(31) | 118.9(13) |
| C(33)-C(32)-H(32) | 120.6     |
| C(31)-C(32)-H(32) | 120.5     |
| C(31)-C(30)-C(29) | 120.0(14) |
| C(31)-C(30)-H(30) | 120.0     |
| C(29)-C(30)-H(30) | 120.0     |

---

Symmetry transformations used to generate equivalent atoms:

#1 -x+1,-y+2,-z+1 #2 x+1,y,z #3 -x,-y+3,-z+1  
 #4 -x+1,-y+1,-z+1 #5 x-1,y,z

**Table S3.** Torsion angles [°] for SLX-3.

---

|                        |           |
|------------------------|-----------|
| Tb(1)-O(1)-C(1)-O(2)   | -27.9(19) |
| Tb(1)-O(1)-C(1)-C(2)   | 148.8(14) |
| Tb(1)#1-O(2)-C(1)-O(1) | 3.3(7)    |
| Tb(1)#1-O(2)-C(1)-C(2) | -173.5(3) |
| O(1)-C(1)-C(2)-C(3)    | -47.4(8)  |
| O(2)-C(1)-C(2)-C(3)    | 129.5(6)  |
| O(1)-C(1)-C(2)-C(7)    | 133.3(6)  |
| O(2)-C(1)-C(2)-C(7)    | -49.8(7)  |
| C(7)-C(2)-C(3)-C(4)    | 2.9(10)   |
| C(1)-C(2)-C(3)-C(4)    | -176.5(7) |
| C(2)-C(3)-C(4)-C(5)    | -1.7(12)  |

|                           |           |
|---------------------------|-----------|
| C(3)-C(4)-C(5)-C(6)       | -0.9(14)  |
| C(4)-C(5)-C(6)-C(7)       | 2.2(13)   |
| C(5)-C(6)-C(7)-C(2)       | -1.0(11)  |
| C(5)-C(6)-C(7)-C(8)       | -177.0(7) |
| C(3)-C(2)-C(7)-C(6)       | -1.5(9)   |
| C(1)-C(2)-C(7)-C(6)       | 177.8(6)  |
| C(3)-C(2)-C(7)-C(8)       | 174.4(6)  |
| C(1)-C(2)-C(7)-C(8)       | -6.2(8)   |
| C(6)-C(7)-C(8)-C(13)      | -54.9(8)  |
| C(2)-C(7)-C(8)-C(13)      | 129.2(6)  |
| C(6)-C(7)-C(8)-C(9)       | 125.0(6)  |
| C(2)-C(7)-C(8)-C(9)       | -50.9(8)  |
| C(13)-C(8)-C(9)-C(10)     | -2.2(8)   |
| C(7)-C(8)-C(9)-C(10)      | 177.9(5)  |
| C(8)-C(9)-C(10)-C(11)     | -0.5(9)   |
| C(9)-C(10)-C(11)-C(12)    | 2.5(8)    |
| C(9)-C(10)-C(11)-C(14)    | -175.3(5) |
| C(10)-C(11)-C(12)-C(13)   | -1.9(8)   |
| C(14)-C(11)-C(12)-C(13)   | 175.8(5)  |
| C(9)-C(8)-C(13)-C(12)     | 2.8(9)    |
| C(7)-C(8)-C(13)-C(12)     | -177.3(5) |
| C(11)-C(12)-C(13)-C(8)    | -0.7(9)   |
| C(12)-C(11)-C(14)-C(15)   | -45.7(8)  |
| C(10)-C(11)-C(14)-C(15)   | 132.1(5)  |
| C(12)-C(11)-C(14)-C(16)#3 | 140.6(5)  |
| C(10)-C(11)-C(14)-C(16)#3 | -41.7(7)  |
| C(16)#3-C(14)-C(15)-C(16) | 0.6(8)    |
| C(11)-C(14)-C(15)-C(16)   | -173.2(5) |
| C(16)#3-C(14)-C(15)-C(17) | -177.7(5) |
| C(11)-C(14)-C(15)-C(17)   | 8.5(8)    |
| C(14)-C(15)-C(16)-C(14)#3 | -0.7(9)   |
| C(17)-C(15)-C(16)-C(14)#3 | 177.8(5)  |
| Tb(1)#5-O(4)-C(17)-O(3)   | -11.1(5)  |
| Tb(1)#5-O(4)-C(17)-C(15)  | 164.7(4)  |
| Tb(1)#5-O(3)-C(17)-O(4)   | 11.5(5)   |
| Tb(1)#5-O(3)-C(17)-C(15)  | -164.4(4) |

|                           |            |
|---------------------------|------------|
| C(16)-C(15)-C(17)-O(4)    | -97.5(6)   |
| C(14)-C(15)-C(17)-O(4)    | 80.9(6)    |
| C(16)-C(15)-C(17)-O(3)    | 78.4(6)    |
| C(14)-C(15)-C(17)-O(3)    | -103.2(6)  |
| C(16)-C(15)-C(17)-Tb(1)#5 | 3.2(17)    |
| C(14)-C(15)-C(17)-Tb(1)#5 | -178.4(12) |
| Tb(1)-O(5)-C(18)-O(6)     | -12.2(9)   |
| Tb(1)-O(5)-C(18)-C(19)    | 164.1(4)   |
| Tb(1)#1-O(6)-C(18)-O(5)   | 43.0(8)    |
| Tb(1)#1-O(6)-C(18)-C(19)  | -133.4(4)  |
| O(5)-C(18)-C(19)-C(20)    | -129.5(5)  |
| O(6)-C(18)-C(19)-C(20)    | 47.2(6)    |
| O(5)-C(18)-C(19)-C(21)#4  | 43.7(7)    |
| O(6)-C(18)-C(19)-C(21)#4  | -139.7(5)  |
| C(21)#4-C(19)-C(20)-C(21) | -0.8(8)    |
| C(18)-C(19)-C(20)-C(21)   | 172.6(4)   |
| C(19)-C(20)-C(21)-C(19)#4 | 0.8(8)     |
| C(19)-C(20)-C(21)-C(22)   | -178.9(5)  |
| C(20)-C(21)-C(22)-C(27)   | 134.7(5)   |
| C(19)#4-C(21)-C(22)-C(27) | -44.9(7)   |
| C(20)-C(21)-C(22)-C(23)   | -45.3(7)   |
| C(19)#4-C(21)-C(22)-C(23) | 135.1(6)   |
| C(27)-C(22)-C(23)-C(24)   | 2.4(10)    |
| C(21)-C(22)-C(23)-C(24)   | -177.6(6)  |
| C(22)-C(23)-C(24)-C(25)   | -0.1(12)   |
| C(23)-C(24)-C(25)-C(26)   | -3.9(12)   |
| C(23)-C(24)-C(25)-C(28)   | 176.7(7)   |
| C(24)-C(25)-C(26)-C(27)   | 5.8(11)    |
| C(28)-C(25)-C(26)-C(27)   | -174.9(7)  |
| C(23)-C(22)-C(27)-C(26)   | -0.5(9)    |
| C(21)-C(22)-C(27)-C(26)   | 179.5(6)   |
| C(25)-C(26)-C(27)-C(22)   | -3.6(10)   |
| C(24)-C(25)-C(28)-C(29)   | 130.2(11)  |
| C(26)-C(25)-C(28)-C(29)   | -49.1(12)  |
| C(24)-C(25)-C(28)-C(33)   | -43.8(11)  |
| C(26)-C(25)-C(28)-C(33)   | 136.9(9)   |

|                         |            |
|-------------------------|------------|
| C(33)-C(28)-C(29)-C(30) | -7(2)      |
| C(25)-C(28)-C(29)-C(30) | 179.0(13)  |
| C(29)-C(28)-C(33)-C(32) | 1.0(17)    |
| C(25)-C(28)-C(33)-C(32) | 175.2(10)  |
| C(29)-C(28)-C(33)-C(34) | 169.3(12)  |
| C(25)-C(28)-C(33)-C(34) | -16.5(15)  |
| C(32)-C(33)-C(34)-O(8)  | 122.4(16)  |
| C(28)-C(33)-C(34)-O(8)  | -46(2)     |
| C(32)-C(33)-C(34)-O(7)  | -55.4(19)  |
| C(28)-C(33)-C(34)-O(7)  | 136.2(15)  |
| C(28)-C(33)-C(32)-C(31) | 2.0(18)    |
| C(34)-C(33)-C(32)-C(31) | -166.8(12) |
| C(30)-C(31)-C(32)-C(33) | 1(2)       |
| C(32)-C(31)-C(30)-C(29) | -7(3)      |
| C(28)-C(29)-C(30)-C(31) | 10(3)      |

---

Symmetry transformations used to generate equivalent atoms:

#1  $-x+1, -y+2, -z+1$  #2  $x+1, y, z$  #3  $-x, -y+3, -z+1$

#4  $-x+1, -y+1, -z+1$  #5  $x-1, y, z$

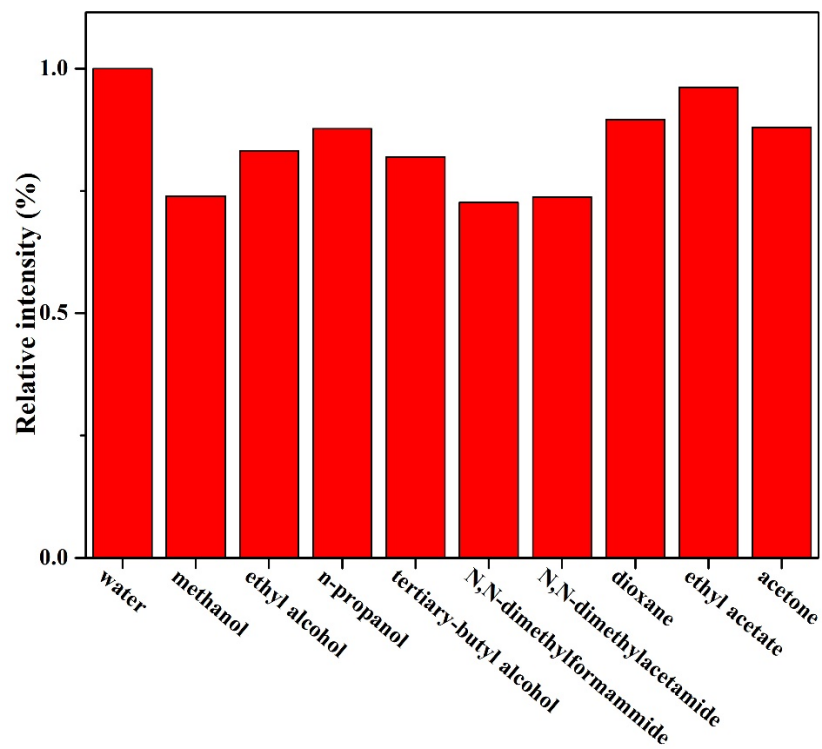

**Fig. S1** The fluorescence intensity of SLX-3 in different solutions.

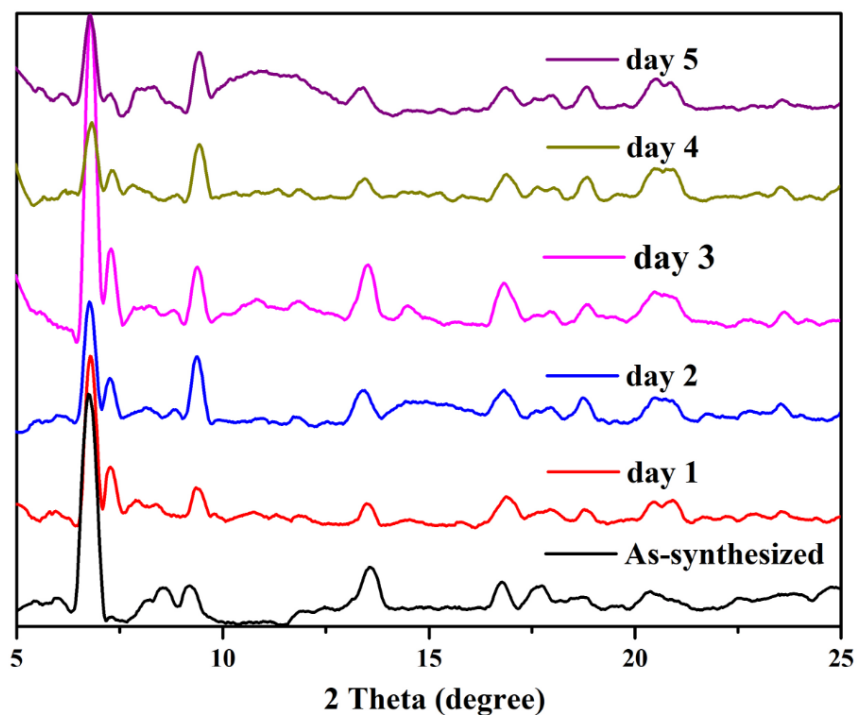

**Fig. S2** PXR D spectra of SLX-3 placed in water for different days (room temperature, 2theta: 5-25 degree)

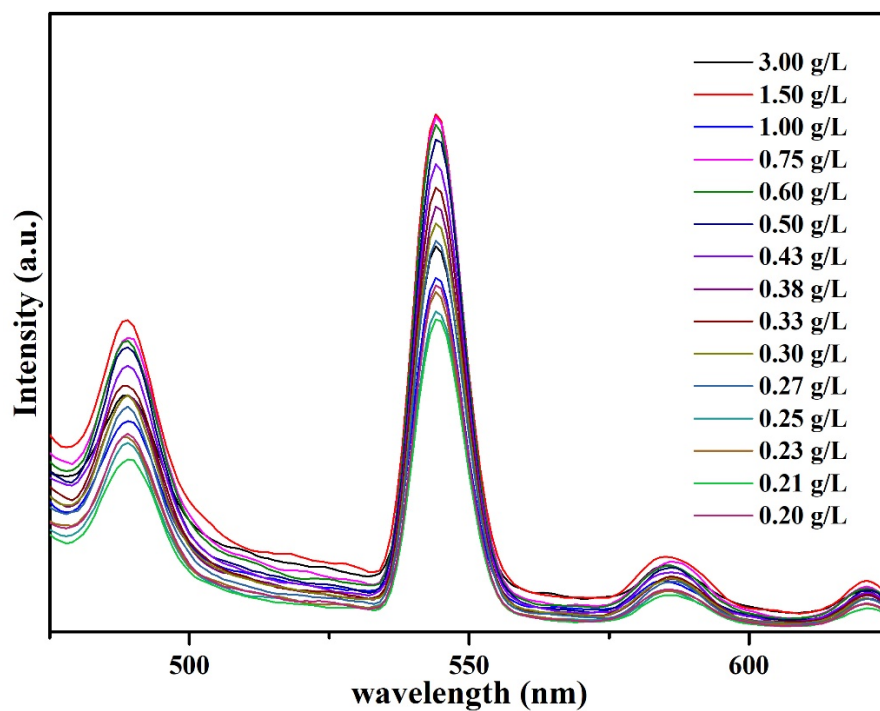

**Fig. S3** Emission spectra of SLX-3 aqueous suspension in different concentration.

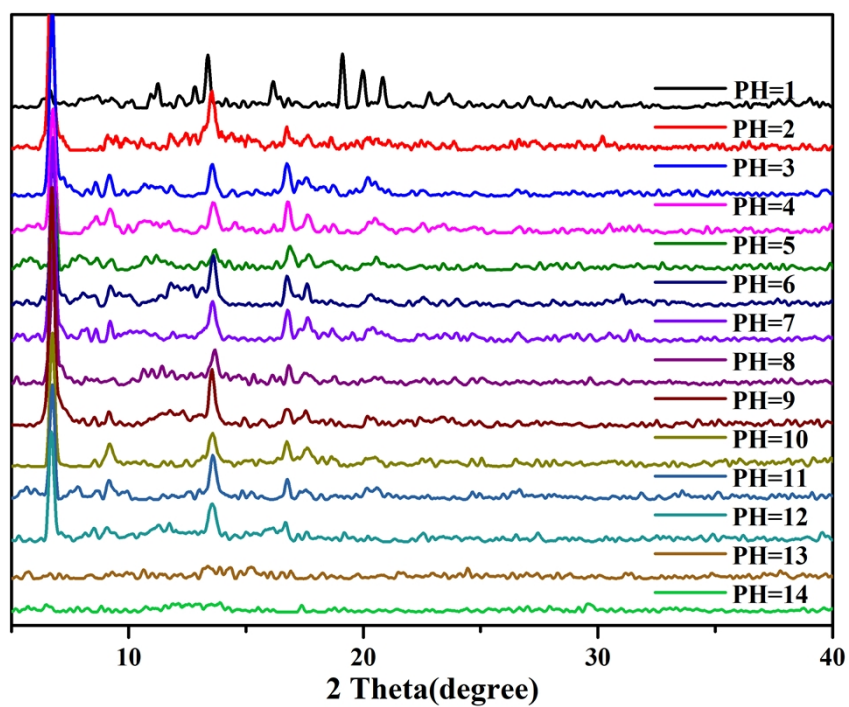

**Fig. S4** PXRD spectra of SLX-3 soaked into different pH solutions (room temperature, 2theta: 5-40 degree)

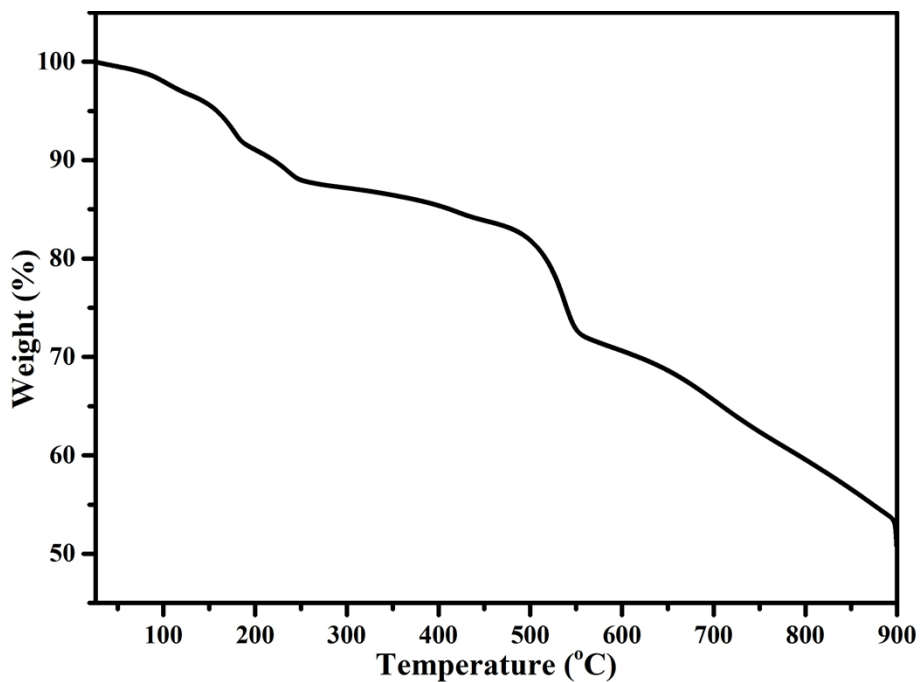

**Fig. S5** TGA curve of SLX-3.

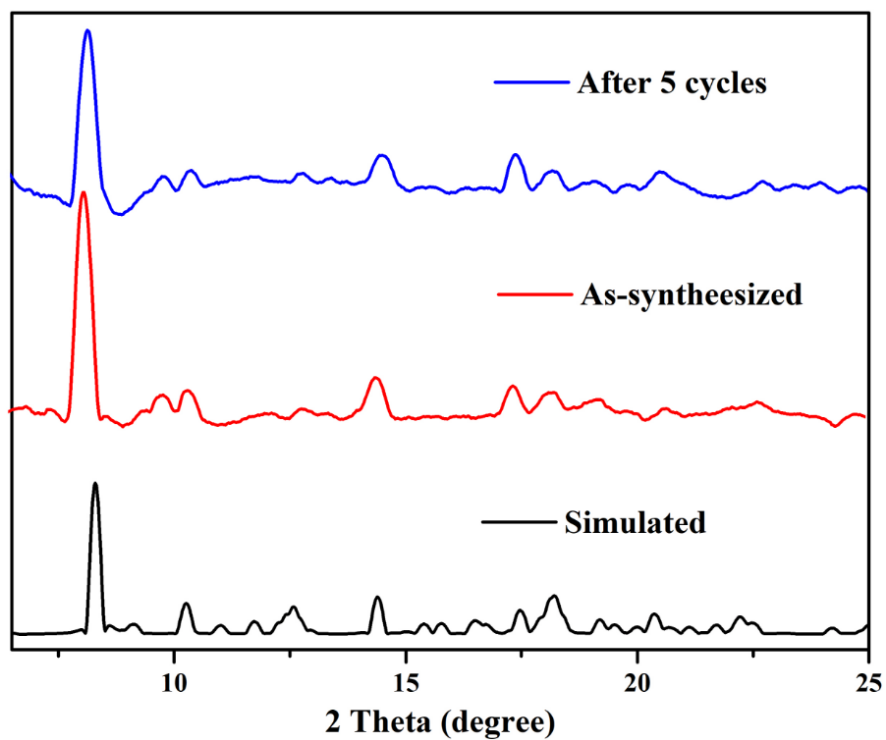

**Fig. S6** PXRD spectra of SLX-3 after five cycles of use.

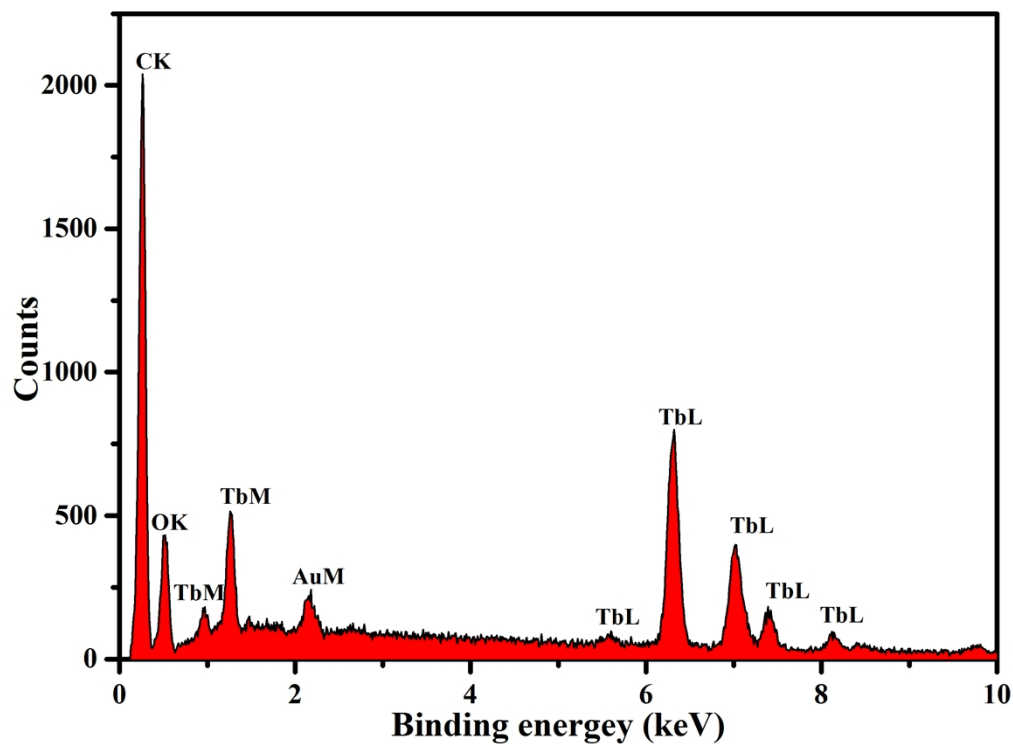

Fig. S7 SEM-EDS of recovered SLX-3 after the sensing of  $\text{MnO}_4^-$ .

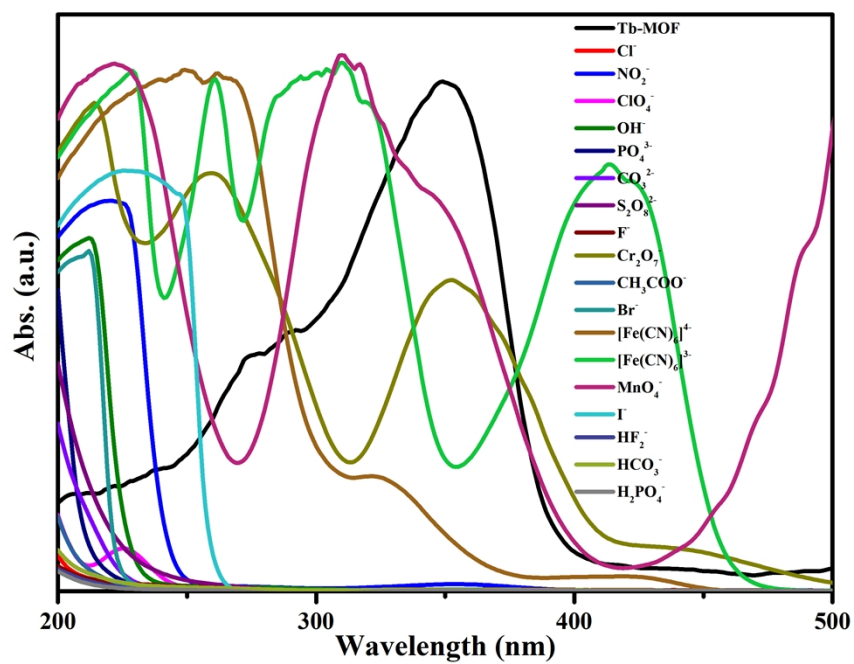

Fig. S8 Ultraviolet absorption spectrum of anion aqueous solutions.



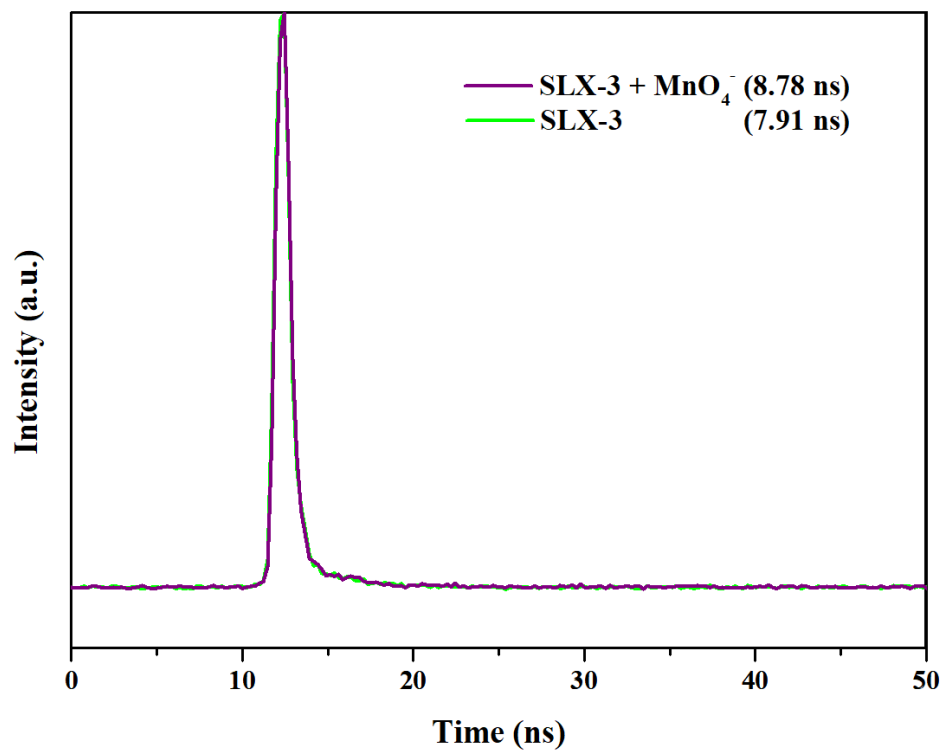

**Fig. S9** Life time plots of sensor SLX-3 and its mixture with  $\text{MnO}_4^-$ .
